# Supplementary material for: Excited-state dynamics of mononucleotides and DNA strands in a deep eutectic solvent
Source: Royal Society of Chemistry journal article supplement (doi:10.1039/c7fd00205j), 2017-11-06
Supplement: c7fd00205j1.pdf [file c7fd00205j1.pdf]

Electronic Supplementary Information

**Excited-State Dynamics of Mononucleotides and DNA Strands in a Deep Eutectic Solvent**

Yuyuan Zhang,<sup>1</sup> Kimberly de La Harpe,<sup>2</sup> Mahesh Hariharan,<sup>3</sup> and Bern Kohler<sup>1,\*</sup>

<sup>1</sup> Department of Chemistry and Biochemistry, The Ohio State University, 100 West 18<sup>th</sup> Avenue, Columbus, Ohio 43210, United States

<sup>2</sup> Department of Physics, United State Air Force Academy, USAF Academy, Colorado 80840, United States

<sup>3</sup> School of Chemistry, Indian Institute of Science Education and Research Thiruvananthapuram, Kerala, India 695 016

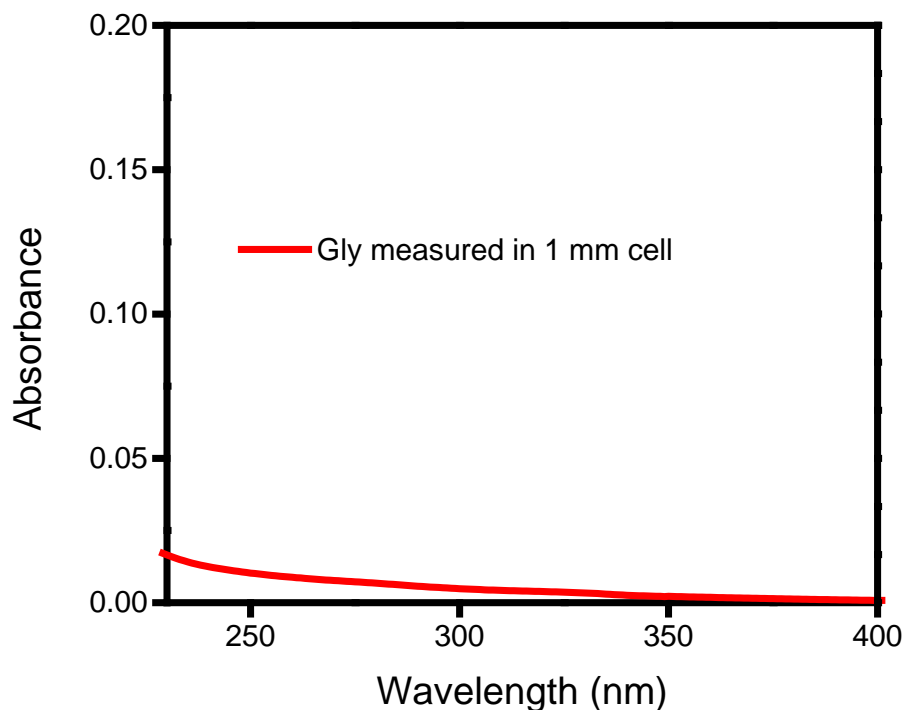

Fig. S1. UV absorption spectrum of glyceline recorded in a 1 mm path length cell.

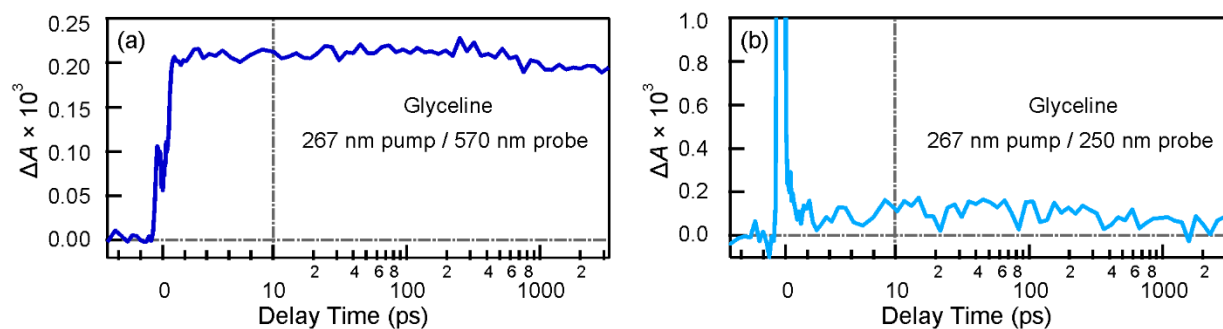

Fig. S2. Transient absorption signals from neat glyceline at probe wavelengths of 570 nm (a) and 250 nm (b), following excitation at 267 nm.

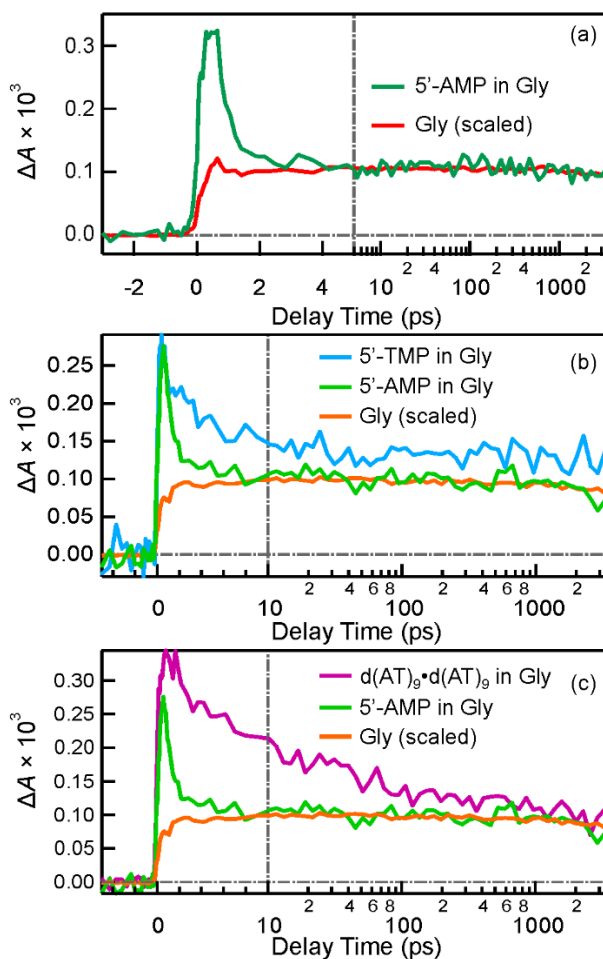

Fig. S3. Raw transient absorption signals for (a) 5'-AMP, (b) 5'-TMP, and (c) d(AT)<sub>9</sub>·d(AT)<sub>9</sub> in glyceline at a probe wavelength of 570 nm before solvent subtraction. In panel (a), the solvent signal has been scaled to match the 5'-AMP signal from 20 ps to 3 ns. In panels b and c, a 5'-AMP solution was prepared to give equal absorbance at 265 nm as the sample, then the solvent signal was scaled to tail match the 5'-AMP signal.
